# Supplementary material for: Conditional deletion of Des1 in the mouse retina does not impair the visual cycle in cones
Source: PubMed Central journal article supplement (PMC6436658; doi:10.1096/fj.201802493r), 2019-01-15

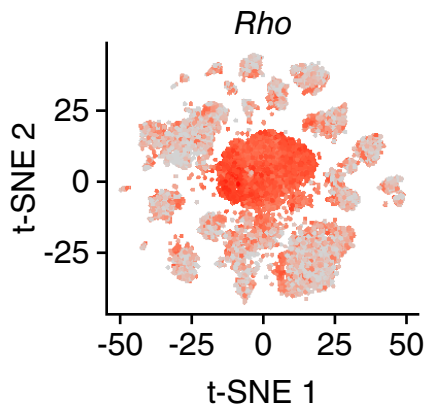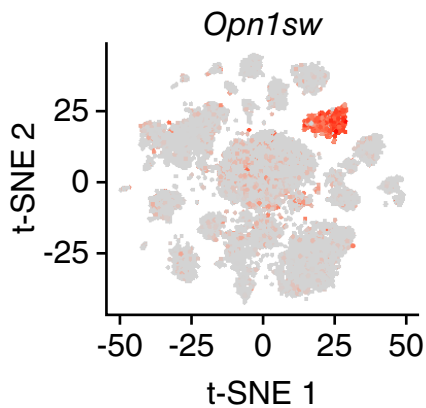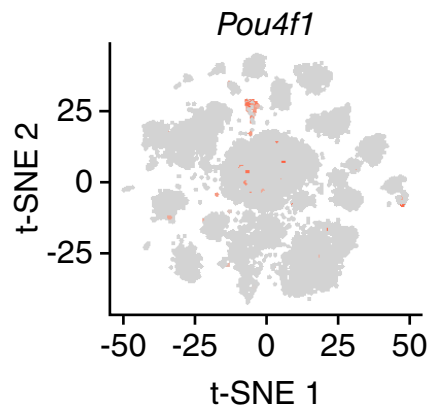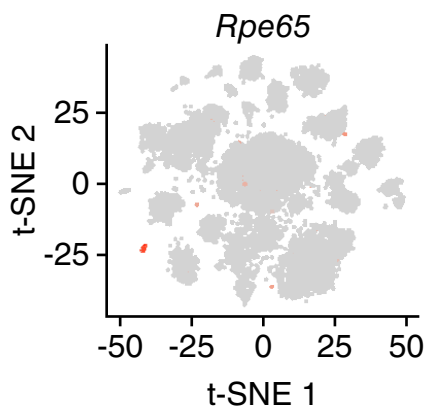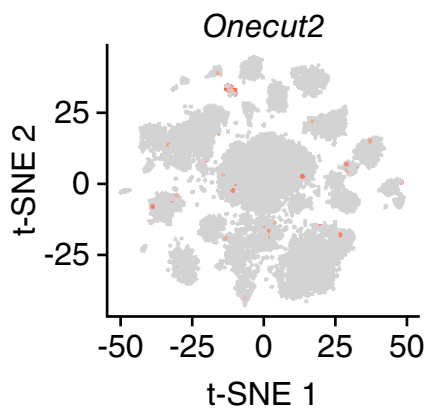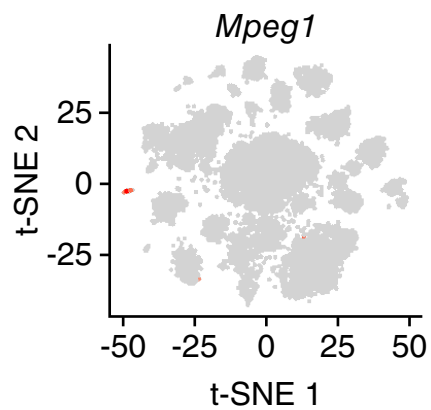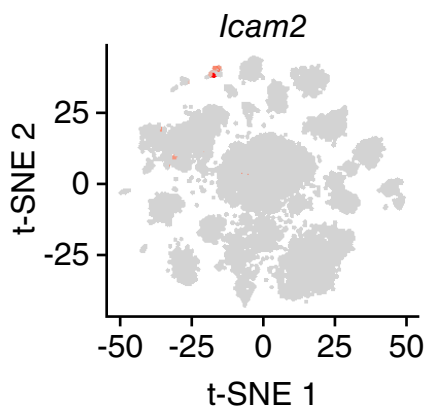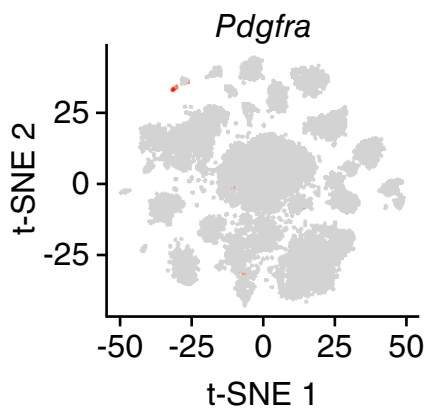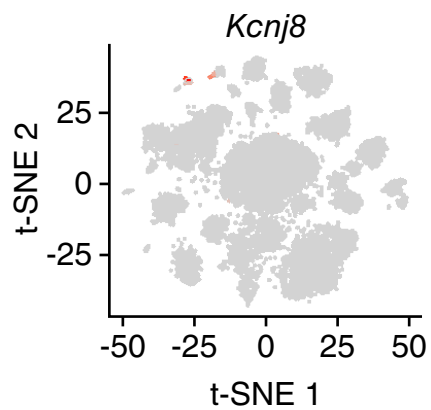

Supplement: fj.201802493R.sf1.pdf [file fj.201802493R.sf1.pdf]
