# Supplementary material for: Conditional deletion of Des1 in the mouse retina does not impair the visual cycle in cones
Source: PubMed Central journal article supplement (PMC6436658; doi:10.1096/fj.201802493r), 2019-01-15

*Bhlhe23*

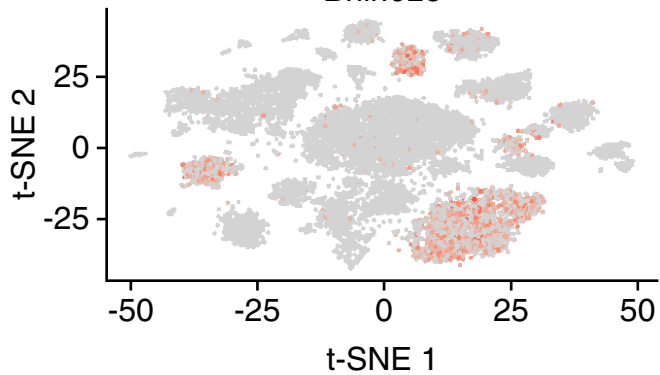

*Prkca*

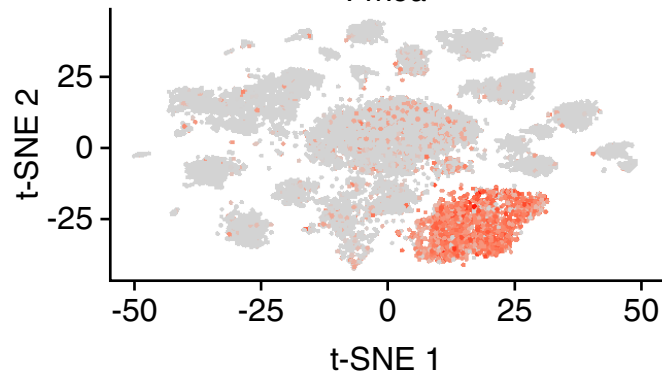

*Sebox*

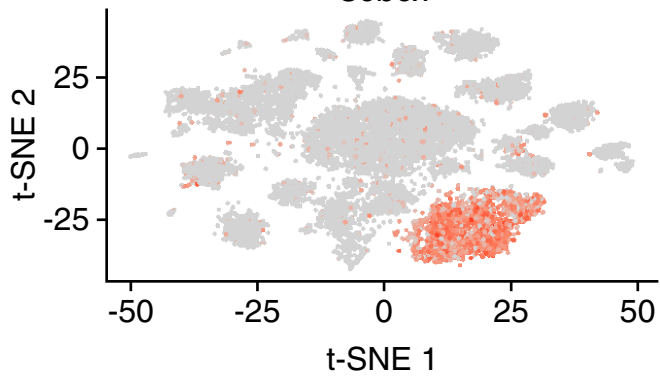

*Cabp5*

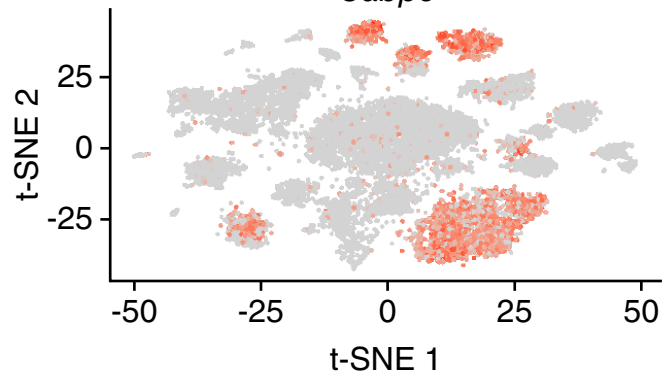

*Vsx2*

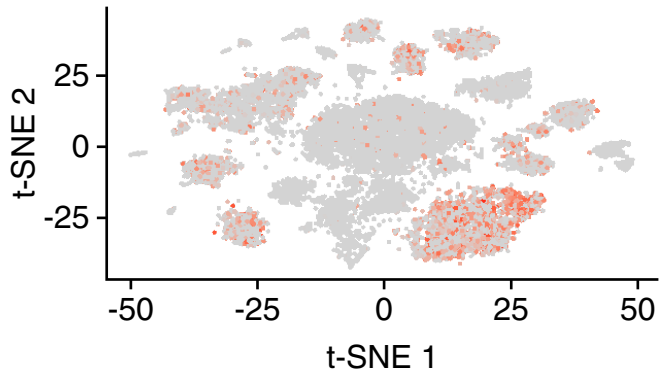

*Vsx1*

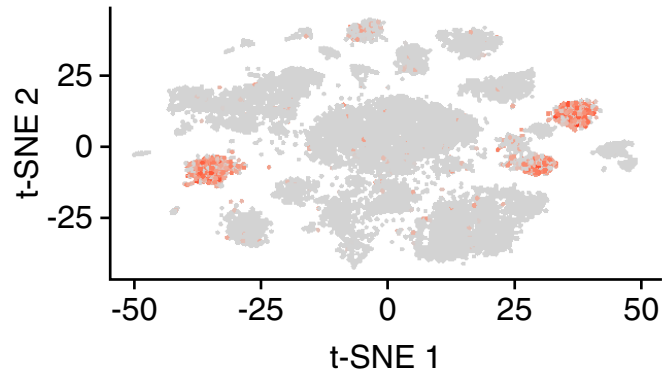

Supplement: fj.201802493R.sf2.pdf [file fj.201802493R.sf2.pdf]
